# Supplementary material
Source: publisher figshare collection journal article supplement (https://acs.figshare.com/ndownloader/files/5180863)
Supplement: Supplementary file 1 [file 5180863]

## Supporting Information (13 pages) for:

### NMR Assignments for a Helical 40 kDa Membrane Protein

Kirill Oxenoid,<sup>†</sup> Hak Jun Kim,<sup>†</sup> Jaison Jacob,<sup>†</sup> Frank D. Sönnichsen,<sup>‡</sup> and Charles R. Sanders<sup>†\*</sup>

*Department of Biochemistry and Center for Structural Biology, Vanderbilt University, Nashville, Tennessee 37232-8725; Department of Physiology and Biophysics, Case Western Reserve University, Cleveland, Ohio 44106-4970*

#### ***Labeling and purification of diacylglycerol kinase.***

Plasmid pSD005 containing a synthetic IPTG-inducible gene for wt- or s-DAGK<sup>1</sup> was used to transform *E. coli* BL21. The constructs included an added purification tag (MGHHHHHHEL-) in place of the N-terminal Met of native DAGK. Transformed BL21 was adapted for growth in perdeuterated medium by successively growing 50 ml cultures in Luria broth/H<sub>2</sub>O, then minimal medium/H<sub>2</sub>O, then minimal medium/70% D<sub>2</sub>O, and finally <sup>15</sup>N-enriched minimal medium with perdeuterated <sup>13</sup>C<sub>6</sub>-glucose and 99% D<sub>2</sub>O. 1 ml of each culture was used to inoculate the succeeding culture. The final 50 ml culture was grown with shaking to OD<sub>600</sub> = 0.5 at 37° C and 5 ml was used to inoculate a fresh 500 ml of the same triple-labeled medium. This culture was grown under the same conditions to OD<sub>600</sub> = 1.0 (ca. 20 hours) and protein expression was induced using 0.2 g/liter IPTG, followed by incubation for another 8-14 hours, and cell harvesting by centrifugation. The minimal medium used in this protocol was supplemented with the aqueous extract from a multiple vitamin (2 ml per liter). This extract was prepared by crushing a 1.5 gram Centrum vitamin (Wyeth Pharmaceuticals, Inc.), which was mixed vigorously with 20 ml water followed by centrifugation and sterile filtration of the supernatant.

Cells harboring recombinant DAGK were suspended in pH 7.7 buffer (75 mM Tris, 0.3 M, 0.2 mM EDTA and 10 micromolar β-hydroxytoluene-- a free-radical scavenger) and lysed using lysozyme, DNase, and sonication. Following low speed centrifugation to remove suspended material, the detergent Empigen (dodecyl-N,N-dimethylglycine, Calbiochem, San Diego, CA) was added to the supernatant to a concentration of 3%. To the mixture was added Ni(II)-agarose resin (Qiagen, Valencia, CA; 1 gram of wet resin was added for every gram of *E. coli* paste originally used). The resin was then transferred to a column and step-eluted by first washing all non-DAGK protein from the resin with a buffer containing 40 mM imidazole and 1.5% Empigen until A<sub>280</sub> returned to baseline. This was followed by re-equilibrating the resin with 8 X 1 column volumes of a solution containing 0.5% dodecylphosphocholine (DPC, Anatrace, Maumee, OH) and 50 mM sodium phosphate, pH 7.0. DAGK was then eluted using 0.5% DPC plus 0.25 M imidazole pH 7.8 solution. At this stage, DAGK was either concentrated for NMR (next paragraph) or was first unfolding/refolded/re-purified and then concentrated for NMR. Yields of DAGK were in the range of 10-30 mgs of pure protein per liter of culture, with yields from perdeuterated medium typically being higher than from non-deuterated medium. Prior to the work of this study early work with s-DAGK was plagued by a spectroscopically-visible impurity which was originally identified as misfolded s-DAGK<sup>2</sup>. This contaminant was

later shown to be the *E. coli* YodA protein (Sanders et. al, correction in *Biochemistry* in press). None of the samples used in the present study were contaminated by a second protein, as was evident from the 2-D TROSY spectra.

To prepare purified DAGK in DPC micelles (plus 250 mM imidazole) for NMR, EDTA was added to 0.5 mM and D<sub>2</sub>O to a concentration of 10%. The pH was adjusted to 6.5 using acetic acid and ammonium hydroxide and the solution was then concentrated to a DAGK homotrimer concentration of 0.4 to 1.1 mM by centrifugal ultrafiltration using a Centricon Plus-20 PL-10 filter cartridge (Millipore, Bedford, MA; 10 kDa molecular weight cut-off). By this operation both DAGK and the detergent DPC were concentrated (since DPC has a relatively low critical micelle concentration). Samples were then transferred to 5 mm NMR tubes.

#### ***Unfolding/refolding method for effecting amide deuterium → hydrogen back-exchange in perdeuterated wt-DAGK.***

In this case, wild type DAGK was purified using a slight modification of the procedure described above. After eluting non-DAGK proteins from the Ni(II)-agarose resin using 1.5% Empigen plus 40 mM imidazole, the resin was rinsed with 3 bed volumes of water. The perdeuterated DAGK was then eluted from the column using 250mM imidazole, pH 7.8, 0.5% sodium dodecylsulfate (SDS). At this stage, DAGK is at least partially unfolded and is susceptible to back exchange of amide deuterons for protons. Samples were allowed to incubate overnight at room temperature and DAGK was then refolded by adapting a procedure known as “reconstitutive refolding”<sup>3</sup>. Briefly, to the DAGK/SDS solution was added a DPC/1-palmitoyl-2-oleoyl-phosphatidylcholine (POPC, Avanti Polar Lipids, Alabaster, AL) solution to make the DAGK:POPC mol:mol ratio = 1:100. The protein solution was transferred to dialysis membrane (Spectra-Por 1.1 or 2.1) and dialyzed exhaustively against 5 changes of buffer over a period of 5 days to remove SDS and DPC. The dialysis buffer contained 10 mM imidazole, 0.5 mM EDTA, 0.2 mM dithiothreitol buffer at pH 6.5 (dithiothreitol was omitted in the final round of dialysis). Following this refolding process, the DAGK-containing vesicles were re-dissolved using 0.5% DPC solution, followed by addition of Ni(II)-agarose resin to the solution. POPC was removed by washing the resin with 0.5% DPC, followed by elution of DAGK with 0.5% DPC plus 0.25 M imidazole, pH 7.8. Measurement of enzyme activity was used to verify that DAGK was correctly refolded<sup>4</sup>. DAGK was then concentrated for NMR as described in the above section.

#### ***Direct Determination of the Moles of DPC bound per DAGK Trimer.***

Pure DAGK bound to Ni(II)-agarose resin was equilibrated with a salt-free solution of 0.5% DPC and then eluted with 0.5% DPC plus 0.5 M ammonium hydroxide. The resulting DAGK pool was weighed and the DAGK concentration was determined spectrophotometrically at 280 nm. The solution was then freeze-dried. The resulting powder was weighed to give the total DPC+DAGK weight. From this, the known weight of the DAGK present and the weight of the free DPC in the original solution (ml of solution X 5 mg/ml) was subtracted to give the weight of the DAGK-associated DPC present in the original solution. Control experiments indicated that virtually all of the ammonium hydroxide was removed during the freeze-drying process (in the form of ammonia), except for that which serves as counterions to charged DAGK side chains. This procedure was conducted three times on different days and using different batches of DAGK, leading to determination of  $151 \pm 22$  molecules of DPC associated with each 43,120 Da DAGK trimer. This corresponds to an aggregate molecular weight of  $96 \pm 14$  kDa.

### ***Determination of the Overall Rotational Correlation Time for DAGK.***

2.2 mM of uniformly  $^{15}\text{N}$  labeled s-DAGK was used for these experiments.  $^{15}\text{N}$   $T_1$  and  $T_2$  measurement were carried out at 45 degrees C on a Bruker DRX-600 spectrometer operating at  $^1\text{H}$  resonance frequency of 600 MHz equipped with a triple resonance cryoprobe. The pulse sequences described in Farrow *et al.* (1994)<sup>5</sup> were used to collect  $^{15}\text{N}$   $T_1$ , and  $T_2$  data sets in which 64 scans were acquired for each  $t_1$  increment.  $128 \times 1024$  complex points were acquired in the  $t_1 \times t_2$  dimensions. For  $T_1$  measurements a total of 5 data sets were collected with  $T_1$  relaxation delays of 5, 800, 1500, 2000, 2500 ms, while for  $T_2$  measurement, with  $T_2$  relaxation delays of 6.4, 12.8, 19.2, 25.6, 32 ms were used. A 1.5 s relaxation delay was used between scans. The  $T_1$  and  $T_2$  rates were obtained by non-linear least square fitting of single exponential decays to the experimental data. The rotational correlation time,  $t_m$ , was estimated for each resonance by solving equation 8 from Kay *et al.* (1989)<sup>6</sup> using a MatLab-based (MathWorks, Natick, MA) program “calctaum\_v2” kindly provided to us by Lewis Kay and Peter Hwang of the University of Toronto. Measured correlation times from backbone amide  $^{15}\text{N}$  of transmembrane segments were averaged to estimate an estimated overall correlation time and associated standard deviation of  $35.5 \pm 7$  nsec. Based on the Stokes-Einstein relationship which assumes a spherical aggregate, this corresponds to an aggregate DAGK + detergent molecular weight of  $101 \pm 20$  kDa.

### ***Determination of the Aggregate Molecular Weight of DAGK in DPC Micelles Using Light Scattering***

An estimate of the aggregate molecular weight of DAGK in DPC micelles at room temperature was very generously conducted by Dr. Michelle H. Chen of Wyatt Technology Corporation (Santa Barbara, CA) using size exclusion chromatography coupled with in-line light scattering, ultraviolet absorption and refraction index detectors, essentially according the method of Yernool *et al.* (2003)<sup>7</sup>. An aggregate molecular weight of  $90 \pm 12$  kDa was determined, with the primary sources of uncertainty being the facts that an estimated 280 nm extinction coefficient was used for DAGK and that an estimated derivative of the refraction index with respect to concentration was used for DPC.

### ***Estimate of DAGK/DPC Aggregate Size From Diffusion Coefficients***

In Vinogradova *et al.* (1998)<sup>8</sup> diffusion coefficients were measured using NMR methods for DAGK in a variety of different micelle types and also for a variety of protein-free micelles of know aggregate sizes. The measured diffusion coefficient for DAGK in DPC micelles was  $(4.7 \pm 0.9) \times 10^{-7} \text{ cm}^2/\text{sec}$ . This diffusion coefficient can be compared to those measured in that same study for free Triton X-100 and lyso-1-myristoyl-*sn*-glycero-3-phosphocholine micelles (both thought to have aggregate molecular weight of ca. 90 kDa) of  $(6.8 \pm 0.9) \times 10^{-7} \text{ cm}^2/\text{sec}$  and  $(5.9 \pm 0.3) \times 10^{-7} \text{ cm}^2/\text{sec}$ , respectively.

### ***NMR Data Processing***

Multidimensional NMR spectra were processing using NMRView<sup>8</sup> and NMRPipe<sup>10</sup> software.

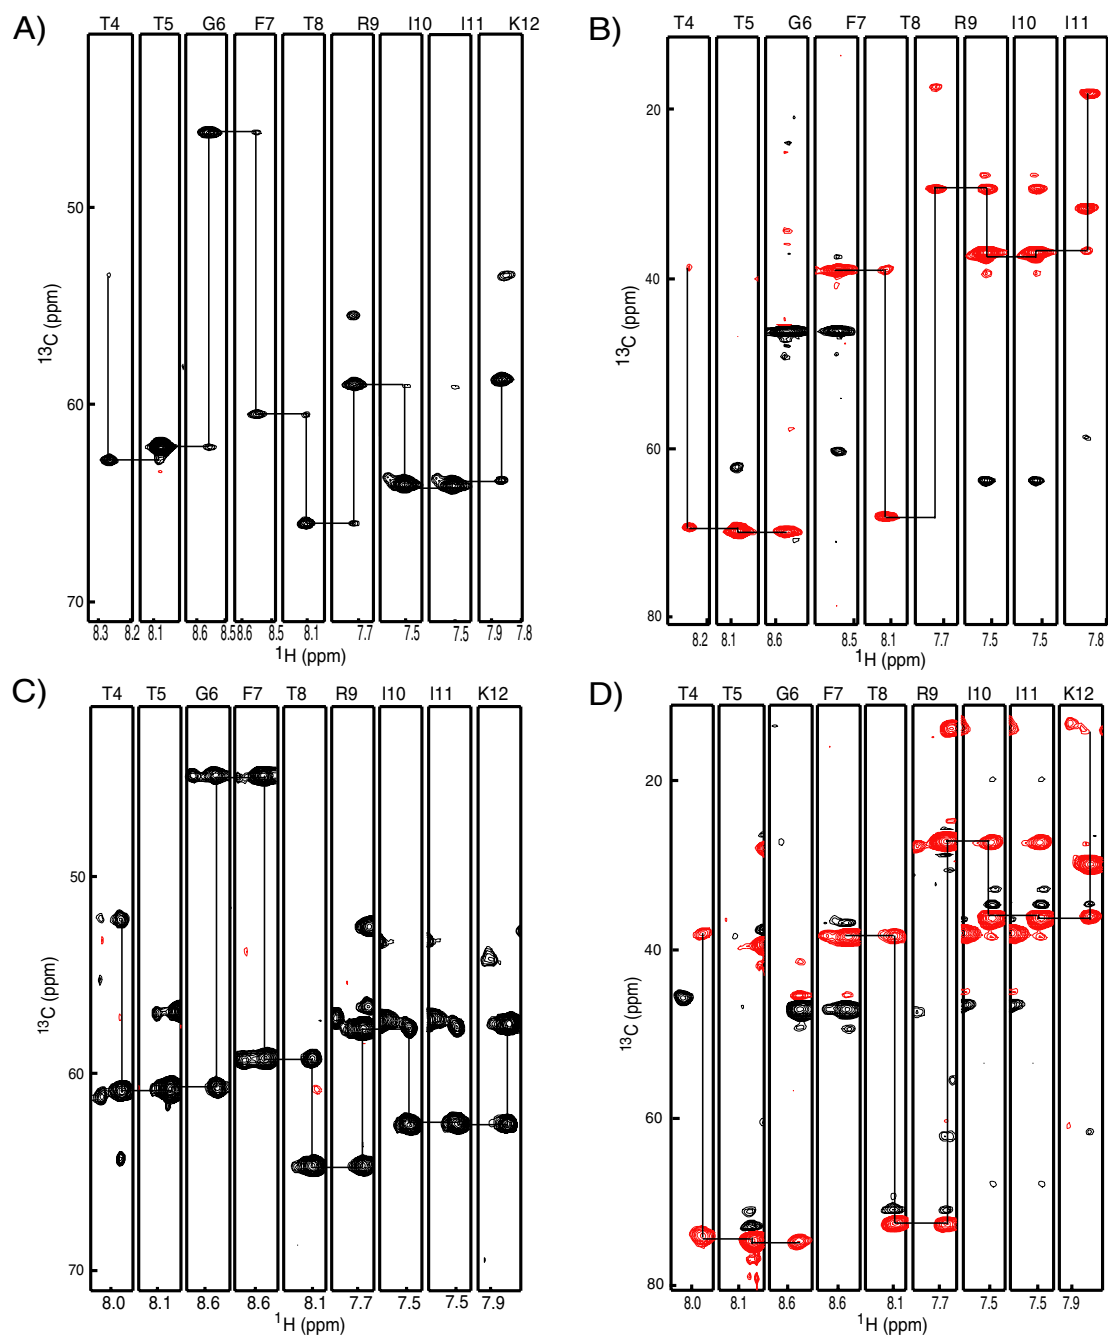

Figure S1. Strip plots corresponding to resonances from residues 4-12 in 800 MHz [ $^{15}\text{N}$ - $^1\text{H}$ ]-TROSY-HNCA and HNCACB experiments of uniformly  $^2\text{H}$ ,  $^{13}\text{C}$ ,  $^{15}\text{N}$ -labeled s-DAGK (A and B) and wt-DAGK (C and D) in DPC micelles at 45 °C. Residues are labeled and numbered on the top of each strip. The lines indicate the connectivities established by intra-residual and sequential peaks detected by each experiment.

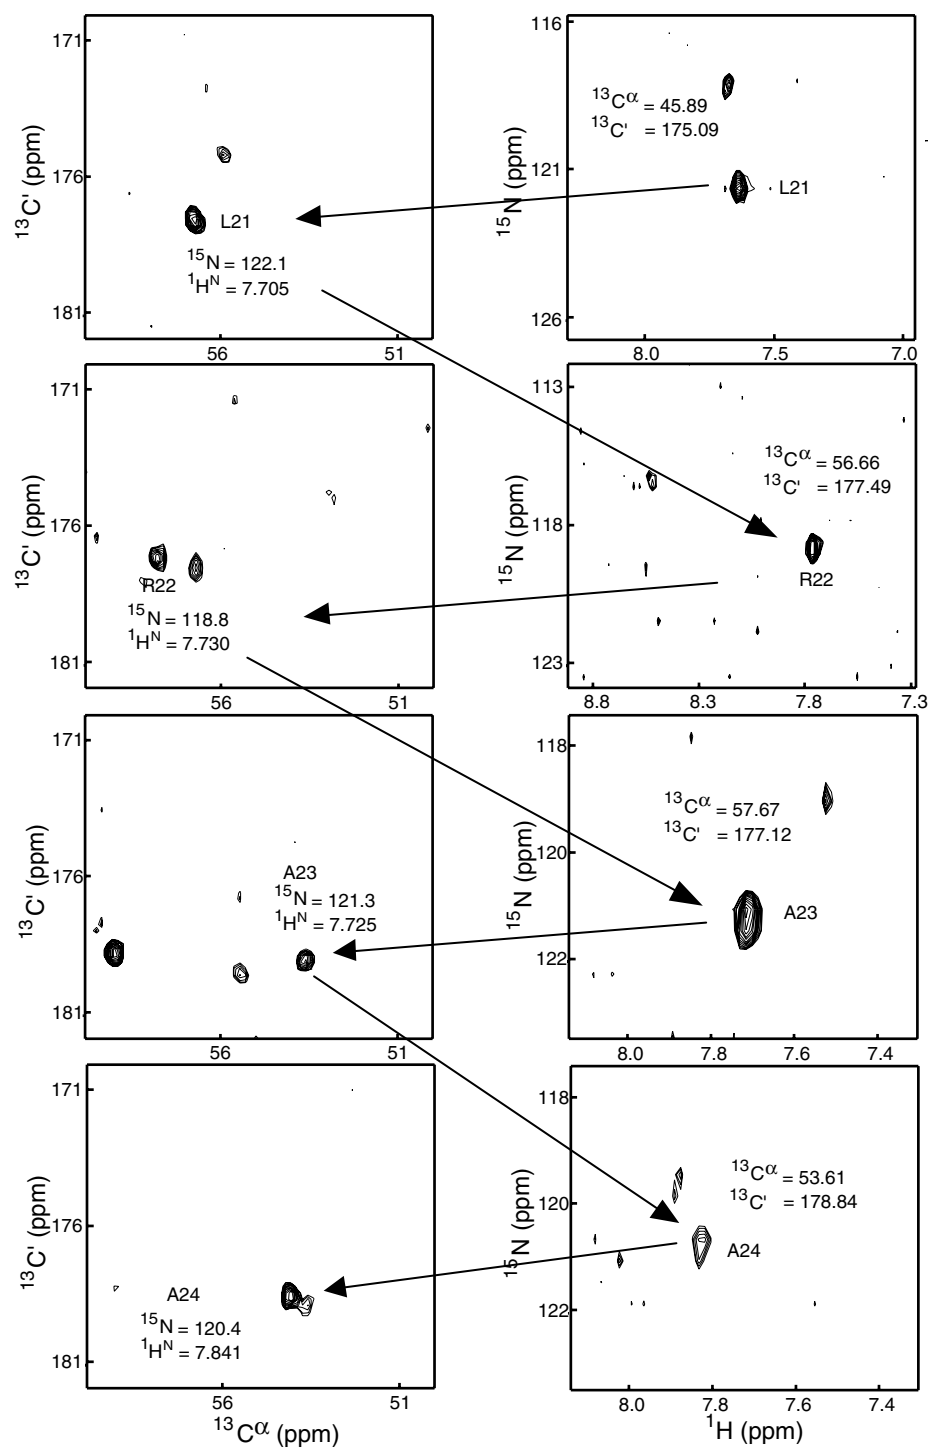

Figure S2. Representative 2D  $^{13}\text{C}^\alpha$ - $^{13}\text{C}'$  and  $^{15}\text{N}$ - $^1\text{H}$  planes from 800 MHz 4D HNCACO and 4D HNCOCA data sets of 3 mM s-DAGK in micelles at 45° C. Illustrated are 2D planes showing resonances and connectivities for residues 21-24. Chemical shifts and cross-peaks are labeled on each plane.



Table 1. Backbone chemical shift assignment of s-DAGK

| Residue | H <sup>N</sup> | N       | C <sup>α</sup> | C <sup>β</sup> | C <sup>γ</sup> |
|---------|----------------|---------|----------------|----------------|----------------|
| A1      | 8.013          | 123.663 | 52.468         | 18.557         | 177.57         |
| N2      | 8.081          | 117.438 | 53.282         | 38.431         |                |
| N3      |                |         | 53.43          | 38.713         | 176.12         |
| T4      | 8.266          | 114.458 | 62.832         | 69.299         | 175.36         |
| T5      | 8.078          | 115.986 | 62.136         | 69.299         | 175.626        |
| G6      | 8.567          | 110.703 | 46.228         |                | 175.126        |
| F7      | 8.558          | 121.071 | 60.496         | 38.867         | 177.375        |
| T8      | 8.113          | 113.603 | 66.04          | 67.977         | 176.31         |
| R9      | 7.725          | 121.093 | 58.976         | 29.315         | 178.745        |
| I10     | 7.517          | 119.314 | 63.897         | 36.831         | 177.123        |
| I11     | 7.517          | 119.314 | 63.897         | 36.831         | 178.231        |
| K12     | 7.871          | 119.919 | 58.743         | 31.597         | 179.305        |
| A13     | 7.759          | 122.274 | 54.056         | 17.914         | 179.07         |
| A14     | 7.854          | 119.688 | 53.399         | 18.011         | 178.152        |
| G15     | 7.829          | 104.301 | 45.967         |                | 175.017        |
| Y16     | 7.616          | 120.008 | 58.677         | 38.533         | 176.054        |
| S17     | 7.995          | 115.025 | 58.615         | 64.686         | 174.889        |
| W18     | 8.258          | 123.253 | 58.668         | 29.472         | 177.191        |
| K19     | 7.994          | 119.601 | 58.723         | 31.522         | 178.781        |
| G20     | 7.846          | 107.73  | 45.894         |                | 175.095        |
| L21     | 7.705          | 122.16  | 56.664         | 41.278         | 177.495        |
| R22     | 7.73           | 118.885 | 57.673         | 29.4           | 177.127        |
| A23     | 7.725          | 121.349 | 53.617         | 17.9           | 178.848        |
| A24     | 7.841          | 120.485 | 54.063         | 18.11          | 178.519        |
| W25     | 7.717          | 117.038 | 58.738         | 29.18          | 176.968        |
| I26     | 7.408          | 117.032 | 62.352         | 37.319         | 176.342        |
| N27     | 7.69           | 117.825 | 54.162         | 39.225         | 175.911        |
| E28     |                |         | 56.527         | 30.662         | 178.837        |
| A29     | 8.212          | 119.876 | 53.827         | 18.134         | 178.154        |
| A30     | 8.212          | 119.876 | 53.827         | 18.134         | 178.154        |
| F31     | 7.385          | 115.0   | 58.583         | 38.503         | 176.297        |
| R32     | 7.565          | 118.86  | 57.669         | 29.898         |                |
| Q33     |                |         | 60.03          |                | 177.983        |
| E34     | 8.808          | 120.689 | 59.381         | 28.238         | 177.83         |
| G35     | 8.343          | 106.873 | 46.769         |                | 175.098        |
| V36     | 7.721          | 120.542 | 66.387         | 30.591         | 177.037        |
| A37     | 7.921          | 121.501 | 55.469         | 17.745         | 178.782        |
| V38     | 7.721          | 115.813 | 66.345         | 30.72          | 177.239        |
| L39     | 7.734          | 119.266 | 58.044         | 40.862         | 178.644        |
| L40     | 8.389          | 118.047 | 57.798         | 40.686         | 178.256        |
| A41     | 8.083          | 120.733 | 55.476         | 18.223         | 179.39         |
| V42     | 8.08           | 116.871 | 66.981         | 30.805         | 178.353        |
| V43     | 8.08           | 116.871 | 66.981         | 30.805         | 178.353        |
| I44     | 8.579          | 119.266 | 65.794         | 37.15          | 179.199        |
| A45     | 8.537          | 120.079 | 54.938         | 18.779         | 179.434        |

|     |       |         |        |        |         |
|-----|-------|---------|--------|--------|---------|
| C46 | 7.795 | 113.375 | 63.137 | 27.907 | 173.643 |
| W47 | 8.092 | 121.704 | 58.876 | 30.949 | 177.171 |
| L48 | 7.5   | 116.016 | 54.863 | 43.615 | 176.609 |
| D49 | 8.829 | 122.966 | 52.813 | 38.933 | 175.218 |
| V50 | 6.747 | 112.817 | 57.962 | 34.555 | 174.907 |
| D51 | 7.813 | 118.491 | 52.936 | 41.255 | 175.48  |
| A52 | 8.29  | 121.889 | 55.879 | 18.708 | 179.332 |
| C53 | 8.07  | 115.293 | 63.541 | 27.186 | 178.151 |
| T54 | 7.574 | 119.063 | 63.91  |        |         |
| R55 |       |         |        |        |         |
| V56 |       |         |        |        |         |
| L57 |       |         |        |        |         |
| L58 |       |         |        |        |         |
| I59 |       |         |        |        |         |
| S60 |       |         |        |        |         |
| S61 |       |         |        |        |         |
| V62 |       |         |        |        |         |
| M63 |       |         |        |        |         |
| L64 |       |         |        |        |         |
| V65 |       |         |        |        |         |
| M66 |       |         |        |        |         |
| I67 |       |         |        |        |         |
| V68 |       |         |        |        |         |
| E69 |       |         |        |        |         |
| L70 |       |         |        |        | 178.557 |
| L71 | 8.256 | 119.063 | 57.858 |        | 179.101 |
| N72 | 8.88  | 117.641 | 57.082 | 38.949 | 177.397 |
| S73 | 8.521 | 116.422 | 62.49  | 63.366 | 177.351 |
| A74 | 8.104 | 126.512 | 55.492 | 17.897 |         |
| I75 |       |         | 65.056 | 36.634 | 178.077 |
| E76 | 8.654 | 120.204 | 60.031 | 28.98  | 177.628 |
| A77 | 7.659 | 119.764 | 54.751 | 16.896 | 179.809 |
| V78 | 7.67  | 116.942 | 66.122 | 30.613 | 177.777 |
| V79 | 8.197 | 119.266 | 66.538 | 30.553 | 178.954 |
| D80 | 8.377 | 120.854 | 56.631 | 39.608 |         |
| R81 |       |         |        |        |         |
| I82 |       |         | 63.494 |        | 177.286 |
| G83 | 7.536 | 107.686 | 45.57  |        | 174.255 |
| S84 | 8.21  | 115.813 | 59.194 | 63.818 | 175.48  |
| E85 | 8.346 | 122.455 | 56.688 | 29.185 | 176.549 |
| Y86 | 8.18  | 121.908 | 58.525 |        |         |
| H87 |       |         |        |        |         |
| E88 |       |         |        |        |         |
| L89 |       |         |        |        |         |
| S90 |       |         |        |        |         |
| G91 | 7.887 | 108.702 | 46.821 |        | 175.517 |
| R92 | 7.785 | 121.551 | 58.921 | 29.512 | 178.2   |



|      |       |         |        |        |         |
|------|-------|---------|--------|--------|---------|
| A93  | 7.857 | 120.485 | 55.687 | 18.222 | 179.67  |
| K94  | 7.505 | 115.406 | 59.397 | 31.524 | 180.009 |
| D95  | 8.473 | 121.908 | 57.396 | 39.819 | 179.465 |
| M96  | 8.274 | 120.079 | 58.507 | 32.019 | 178.431 |
| G97  | 8.007 | 106.597 | 47.186 |        | 176.247 |
| S98  | 8.047 | 115.406 | 61.918 | 62.877 | 177.739 |
| A99  | 7.97  | 125.147 | 54.82  | 17.2   | 178.622 |
| A100 | 7.762 | 121.053 | 55.491 | 17.316 | 179.414 |
| V101 | 7.454 | 117.628 | 66.499 | 30.888 | 177.813 |
| L102 | 7.758 | 119.876 | 58.207 | 40.331 |         |
| I103 |       |         |        |        |         |
| A104 |       |         |        |        |         |
| I105 |       |         |        |        |         |
| I106 |       |         |        |        |         |
| D107 |       |         |        |        |         |
| A108 |       |         |        |        |         |
| V109 |       |         |        |        |         |
| I110 |       |         | 62.475 |        | 175.798 |
| T111 | 8.227 | 116.016 | 62.854 | 69.625 |         |
| W112 |       |         |        |        |         |
| C113 | 8.725 | 116.014 | 63.365 | 26.8   | 176.583 |
| I114 | 7.926 | 118.251 | 67.281 |        | 179.178 |
| L115 | 7.965 | 118.86  | 57.707 |        | 180     |
| L116 | 8.486 | 117.641 | 56.892 | 40.288 | 178.966 |
| W117 | 8.334 | 122.553 | 60.638 | 29.441 | 178.701 |
| S118 | 7.923 | 110.734 | 60.648 | 63.091 | 175.869 |
| H119 | 7.695 | 118.657 | 58.268 | 29.968 | 175.881 |
| F120 | 8.01  | 115.629 | 58.148 | 39.743 | 175.104 |
| G121 | 7.608 | 114.308 | 46.067 |        |         |

---

Table 2. Backbone chemical shift assignment of wt-DAGK

| Residue | H <sup>N</sup> | N       | C <sup>α</sup> | C <sup>β</sup> | C <sup>γ</sup> |
|---------|----------------|---------|----------------|----------------|----------------|
| A1      | 8.041          | 123.268 | 52.446         | 18.08          | 177.65         |
| N2      | 8.107          | 117.691 | 53.24          | 38.292         |                |
| N3      |                |         | 53.736         | 38.388         | 175.594        |
| T4      | 7.994          | 114.112 | 62.236         | 69.259         | 175.117        |
| T5      | 8.089          | 115.936 | 62.099         | 69.731         | 175.613        |
| G6      | 8.588          | 110.688 | 46.24          |                | 175.387        |
| F7      | 8.597          | 121.189 | 60.554         | 38.624         | 177.409        |
| T8      | 8.13           | 113.67  | 66.081         | 67.962         | 176.35         |
| R9      | 7.713          | 121.08  | 59.018         | 28.976         | 178.816        |
| I10     | 7.518          | 119.484 | 63.995         | 36.805         | 179.01         |
| I11     | 7.518          | 119.484 | 63.932         | 36.596         | 178.31         |
| K12     | 7.873          | 119.98  | 58.769         | 31.28          | 179.431        |
| A13     | 7.777          | 122.297 | 54.098         | 17.408         |                |
| A14     | 7.856          | 119.666 | 53.404         | 17.68          | 178.16         |
| G15     | 7.821          | 104.326 | 45.95          |                | 175.065        |
| Y16     | 7.619          | 119.919 | 58.677         | 38.265         | 176.023        |
| S17     | 7.909          | 114.862 | 58.493         | 64.394         | 174.912        |
| W18     | 8.363          | 123.394 | 58.795         | 28.873         | 178.869        |
| K19     | 8.053          | 119.371 | 58.823         | 31.17          | 178.979        |
| G20     | 7.853          | 107.77  | 45.974         |                | 175.473        |
| L21     | 7.85           | 122.836 | 56.913         | 41.067         | 177.694        |
| R22     | 7.773          | 118.716 | 58.047         | 29.497         | 177.308        |
| A23     | 7.694          | 121.072 | 53.748         | 17.4           | 179.025        |
| A24     | 7.795          | 120.42  | 53.98          | 17.606         | 178.604        |
| W25     | 7.755          | 117.083 | 58.733         | 28.981         | 176.99         |
| I26     | 7.472          | 117.073 | 62.303         | 36.934         | 176.347        |
| N27     | 7.682          | 118.07  | 54.112         | 38.993         | 175.896        |
| E28     | 8.052          | 119.755 | 56.928         | 28.852         |                |
| A29     |                |         |                |                | 178.31         |
| A30     | 7.856          | 119.666 | 53.404         | 17.68          | 178.244        |
| F31     | 7.442          | 114.892 | 58.539         | 38.226         | 176.147        |
| R32     | 7.567          | 118.243 | 57.26          | 29.739         | 177.697        |
| Q33     | 7.773          | 118.716 | 56.82          | 29.499         | 179.369        |
| E34     | 8.23           | 119.819 | 58.051         | 31.844         | 177.876        |
| G35     | 8.26           | 107.15  | 47.384         |                | 175.117        |
| V36     | 7.647          | 120.277 | 66.323         | 30.455         |                |
| A37     |                |         | 55.388         | 17.54          | 178.807        |
| V38     | 7.579          | 115.497 | 66.384         | 30.418         | 177.694        |
| L39     | 7.729          | 118.831 | 57.939         | 40.586         | 178.723        |
| L40     | 8.287          | 118.16  | 57.841         | 40.439         | 178.316        |
| A41     | 7.912          | 120.741 | 55.321         | 17.347         | 179.583        |
| V42     | 8.144          | 118.039 | 67.39          | 30.35          | 178.09         |
| V43     | 8.171          | 120.104 | 67.503         | 30.265         | 178.692        |
| I44     | 8.484          | 119.752 | 65.894         | 36.929         | 178.47         |
| A45     | 8.656          | 120.965 | 54.925         | 18.03          | 179.431        |

|     |       |         |        |        |         |
|-----|-------|---------|--------|--------|---------|
| C46 | 7.752 | 113.711 | 63.27  | 27.435 | 173.343 |
| W47 | 8.066 | 121.423 | 58.666 | 30.415 | 177.085 |
| L48 | 7.526 | 116.327 | 55.037 | 43.769 | 176.818 |
| D49 | 8.911 | 123.257 | 52.926 | 38.868 | 175.217 |
| V50 | 6.745 | 112.811 | 58.00  | 34.488 | 174.82  |
| D51 | 7.766 | 118.463 | 53.083 | 41.36  | 175.219 |
| A52 | 8.342 | 122.0   | 55.68  | 18.211 | 178.925 |
| I53 | 7.591 | 116.586 | 65.107 | 36.21  | 177.853 |
| T54 | 8.021 | 118.33  | 67.693 | 66.792 |         |
| R55 |       |         |        |        | 178.873 |
| V56 | 6.936 | 116.478 | 66.789 | 30.45  | 179.034 |
| L57 | 7.947 | 123.026 | 57.842 | 41.496 | 180.378 |
| L58 | 8.336 | 121.062 | 57.874 | 39.664 | 179.657 |
| I59 | 7.804 | 117.048 | 65.461 | 38.404 | 178.054 |
| S60 | 9.237 | 116.271 | 62.653 | 62.646 | 177.379 |
| S61 | 7.935 | 115.872 | 61.645 | 62.646 | 177.519 |
| V62 | 7.046 | 118.906 | 65.155 | 30.532 | 178.109 |
| M63 | 8.242 | 119.989 | 57.165 | 30.314 | 179.397 |
| L64 | 8.165 | 121.108 | 57.938 | 39.536 | 178.837 |
| V65 | 6.936 | 116.478 | 66.789 | 30.345 | 177.474 |
| M66 | 6.931 | 116.516 | 58.072 | 32.406 |         |
| I67 |       |         |        |        | 178.304 |
| V68 | 7.982 | 116.436 | 66.92  | 30.382 | 177.866 |
| E69 | 8.801 | 121.043 | 59.076 | 28.066 | 179.876 |
| I70 | 8.395 | 122.605 | 65.642 | 36.767 | 178.721 |
| L71 | 8.084 | 120.736 | 58.113 | 41.072 | 179.186 |
| N72 | 8.831 | 117.737 | 56.928 | 38.464 | 177.431 |
| S73 | 8.344 | 116.626 | 62.289 | 62.646 | 177.244 |
| A74 | 8.089 | 126.737 | 55.334 | 17.275 | 178.806 |
| I75 | 7.832 | 118.51  | 65.318 | 36.804 | 178.251 |
| E76 | 8.595 | 120.065 | 59.843 | 28.73  | 178.35  |
| A77 | 7.612 | 119.968 | 54.454 | 17.281 | 180.115 |
| V78 | 7.62  | 117.128 | 66.077 | 30.376 | 177.775 |
| V79 | 8.102 | 118.797 | 66.25  | 30.396 | 178.923 |
| D80 | 8.4   | 120.764 | 56.613 | 39.678 | 177.922 |
| R81 | 7.529 | 117.67  | 57.018 | 30.315 |         |
| I82 |       |         |        |        | 177.385 |
| G83 | 7.684 | 108.223 | 45.703 |        | 174.504 |
| S84 | 8.152 | 115.757 | 59.291 | 63.199 | 175.513 |
| E85 | 8.328 | 122.181 | 56.823 | 28.927 | 178.119 |
| Y86 | 7.591 | 118.4   | 63.284 | 37.721 |         |
| H87 |       |         |        |        |         |
| E88 |       |         |        |        | 175.813 |
| L89 | 8.044 | 115.928 | 58.093 | 39.483 |         |
| S90 |       |         |        |        | 176.064 |
| G91 | 7.975 | 108.959 | 46.629 |        | 175.434 |
| R92 | 7.802 | 121.364 | 58.448 | 29.416 | 178.014 |

|      |       |         |        |        |         |
|------|-------|---------|--------|--------|---------|
| A93  | 7.971 | 121.056 | 55.282 | 18.038 | 179.514 |
| K94  | 7.601 | 116.324 | 59.049 | 31.41  | 179.515 |
| D95  | 8.415 | 121.633 | 56.833 | 39.891 | 179.369 |
| M96  | 8.23  | 119.819 | 58.051 | 31.889 | 177.876 |
| G97  | 8.26  | 107.15  | 47.384 |        | 176.279 |
| S98  | 7.854 | 114.455 | 61.723 | 62.684 | 177.324 |
| A99  | 8.028 | 125.426 | 54.092 | 16.887 | 179.055 |
| A100 | 7.936 | 119.884 | 55.465 | 16.699 | 179.263 |
| V101 | 7.33  | 117.291 | 66.396 | 30.82  | 177.755 |
| L102 | 7.726 | 119.481 | 58.148 | 40.396 | 179.012 |
| I103 | 8.266 | 117.18  | 64.822 | 35.818 | 177.518 |
| A104 | 7.977 | 122.179 | 55.865 | 16.432 | 179.941 |
| I105 | 8.103 | 117.18  | 63.933 | 35.891 | 179.141 |
| I106 | 7.609 | 117.891 | 66.611 | 36.671 | 177.417 |
| V107 | 8.376 | 118.308 | 66.912 | 30.368 | 179.144 |
| A108 | 8.082 | 126.871 | 56.161 | 15.939 |         |
| V109 |       |         |        |        |         |
| I110 | 7.997 | 114.189 | 65.724 | 36.391 | 177.852 |
| T111 | 8.302 | 116.899 | 68.42  |        |         |
| W112 |       |         |        |        | 178.547 |
| C113 | 8.699 | 115.842 | 64.883 | 26.785 | 176.983 |
| I114 | 8.519 | 116.935 | 65.887 | 36.772 | 178.932 |
| L115 | 7.992 | 116.267 | 57.341 | 40.295 | 180.297 |
| L116 | 8.422 | 117.641 | 56.532 | 40.368 | 178.82  |
| W117 | 8.198 | 122.812 | 60.641 | 28.878 | 178.654 |
| S118 | 8.031 | 110.86  | 60.268 | 62.647 | 176.008 |
| H119 | 7.776 | 118.762 | 57.233 | 29.499 | 175.392 |
| F120 | 8.014 | 118.159 | 58.246 | 39.512 | 175.089 |
| G121 | 7.61  | 114.282 | 46.049 |        |         |

---

### ***References for Supporting Information***

1. Zhou, Y., and Bowie, J. U. (2000) *J. Biol. Chem.* 275, 6975-6979.
2. Oxenoid, K., Sönnichsen, F.D., and Sanders, C.R. (2001) *Biochemistry* 5111-5118.
3. Gorzelle, B.M., Nagy, J.K., Oxenoid, K., Lonzer, W.L., Cafiso, D.S., and Sanders, C.R. (1999) *Biochemistry* 38, 16373-16382.
4. Czerski, L. and C. R. Sanders (2000) *Anal. Biochem.* 284, 327-333.
5. Farrow, N. A., Muhandiram, R., Singer, A. U., Pascal, S. M, Kay, C. M., Gish, G., Shoelson, S. E., Pawson, T., Forman-Kay, J. D., and Kay, L. E. (1994) *Biochemistry* 33, 5984-6003.
6. Kay, L. E., Torchia, D. A., and Bax, A. (1989) *Biochemistry* 28, 8972-8979.
7. Yernool, D., Boudker, O., Folta-Stogniew, E., and Gouaux, E. (2003) *Biochemistry* 42, 12981-12988.
8. Vinogradova, O., Sönnichsen, F.D., and Sanders, C.R. (1998) *J. Biomol. NMR* 381-386.
9. Johnson BA and J. Blevins (1994) *J. Biomol. NMR* 4, 603-614.
10. Delaglio F, Grzesiek S, Vuister GW, Zhu G, Pfeifer J and A. Bax (1995) *J. Biomol. NMR* 6, 277-293.
